# Supplementary material for: Metabolomic profile of diabetic retinopathy: a GC-TOFMS-based approach using vitreous and aqueous humor
Source: Springer Nature journal article supplement (doi:10.1007/s00592-019-01363-0), 2019-05-14
Supplement: MOESM6 [file 16722132]

## Sheet: 非靶向房水（整理）
disease	对应编号	SampleID	gender	Gender	BMI (kg/m2)	AGE	Hypertension	Hypertension	Diabetes	Diabetes	Hab % 4.4-6.0	Blood Glucose mmol/L 3.9-6.1	Total cholesterol (mmol/L) <5.2	LDL cholesterol (mmol/L)1.3-4.14	HDL cholesterol (mmol/L) 0.95-1.85	甘油三酯<1.7mmol/l	Chronic kidney disease	Chronic kidney disease	On diabetes medication	On diabetes medication	VA	SCr
白内障	1	AC3	F	2	21.07	60	N	2	N	2	5.3	6.4	1.47	4.1	1.07	0.87	N	2	N	2		67.1
白内障	1	AC4	F	2	20.53	62	Y	1	N	2	5.6	4.64	1.6	2.67	1.65	1.43	N	2	N	2		63.31
白内障	1	AC5	M	1	26.15	50	Y	1	N	2	6	3.89	2.45	1.45	0.87	0.78	N	2	N	2		70.33
白内障	1	AC6	M	1	22.48	55	Y	1	N	2	5.1	5.07	5.43	1.65	0.69	0.45	N	2	N	2		89.2
白内障	1	AC7	M	1	21.41	59	Y	1	N	2	4.8	4.27	4.43	3.01	1.26	0.7	N	2	N	2		72.31
白内障	1	AC8	F	2	23.17	54	N	2	N	2	5.1	5.15	6.81	2.34	1.6	1.67	N	2	N	2		84.56
白内障	1	AC9	F	2	18.6	62	N	2	N	2	4.8	3.98	5.9	1.5	1.54	1.34	N	2	N	2		78.12
白内障	1	AC10	M	1	21.78	79	Y	1	N	2	4.6	4.01	6.83	3.01	0.98	1.65	N	2	N	2		73.19
白内障	1	AC11	F	2	25.47	63	N	2	N	2	5.2	4.89	3.43	1.98	0.67	1.04	N	2	N	2		70.75
白内障	1	AC12	M	1	25.23	52	Y	1	N	2	5.1	5.23	6.58	2.41	0.34	0.65	N	2	N	2		66.23
白内障	1	AC13	M	1	22.56	65	N	2	N	2	5.4	6.05	7.21	2.06	2.05	1.34	N	2	N	2		72.11
白内障	1	AC14	F	2	27.18	58	N	2	N	2	5	5.67	5.32	4.23	1.45	0.67	N	2	N	2		61.21
白内障	1	AC15	M	1	22.45	50	N	2	N	2	4.7	5.98	2.8	3.86	2.01	0.45	N	2	N	2		82.32
白内障	1	AC16	M	1	26.23	54	N	2	N	2	4.6	4.78	4.74	1.34	1.06	0.67	N	2	N	2		68.88
白内障	1	AC17	F	2	19.29	51	N	2	N	2	5.1	5.98	3.21	2.45	0.45	0.98	N	2	N	2		87.16
取硅油	1	AC18	M	1	27.18	66	N	2	N	2	5.2	6.04	4.33	3.66	0.23	1.24	N	2	N	2		90.62
白内障	1	AC19	M	1	26.15	68	N	2	N	2	5.4	6.78	1.84	3.4	0.78	1.76	N	2	N	2		82.25
白内障	1	AC53	F	2	20.56	62	N	2	N	2	5.2	7.02	5.11	1.2	0.65	2.01	N	2	N	2		65.9
白内障	1	AC54	M	1	23.17	59	Y	1	N	2	4.5	4.86	2.67	3.86	1.23	1.55	N	2	N	2		73.4
取硅油	1	AC55	M	1	25.78	62	Y	1	N	2	4.7	4.12	4.32	2.87	1.27	1.4	N	2	N	2		62.09
MH	1	ac56	F	2	24.14	61	N	2	N	2	5	5.45	5.2	1.78	1.45	0.45	N	2	N	2		86.1
白内障	1	AC57	F	2	24.23	54	N	2	N	2	5.9	5.89	3.74	2.65	0.89	2.09	N	2	N	2		60.7
白内障	1	AC58	F	2	20.65	54	Y	1	N	2	5.9	6.23	3.32	1.65	0.67	1.76	N	2	N	2		90.26
取硅油	1	AC59	M	1	24.21	57	N	2	N	2	5.2	5.41	4.28	4.35	0.78	1.04	N	2	N	2		89.25
白内障	1	AC60	F	2	25.65	48	N	2	N	2	4.4	4.32	1.59	3.67	1.03	1.5	N	2	N	2		94.13
糖网	2		F	2	22.46	64	N	2	Y	1	6.6	8.07	6.41	2.06	1.64	0.34	N	2	Y	1	HM/20CM	57.11
糖网玻血	2		M	1	22.48	63	Y	1	Y	1	5.6	6.84	3.45	1.91	1.5	0.56	N	2	Y	1	HM/10CM	58.1
糖网	2		M	1	23.59	35	Y	1	Y	1	7.6	12.4	4.27	1.45	0.67	1.23	N	2	Y	1	FC/11CM	77.24
糖网	2		M	1	26.41	55	Y	1	Y	1	6.8	9.45	4.35	1.56	1.23	0.54	N	2	Y	1	HM/12CM	67.8
糖网	2		F	2	17.96	57	N	2	Y	1	6.5	8.23	6.19	4.45	0.77	2.21	N	2	Y	1	HM/10CM	77.51
糖网	2		M	1	24.63	65	N	2	Y	1	6.6	7.07	4.16	2.95	0.81	0.65	N	2	Y	1	HM/10CM	60
糖网	2		M	1	23.45	54	N	2	Y	1	7.7	8.2	4.26	2.1	1.47	1.76	N	2	Y	1	0.15	79.16
糖网	2		F	2	27.04	56	N	2	Y	1	7.8	8.22	5	3.38	1.19	1.57	N	2	Y	1	0.2	66.5
糖网	2		F	2	23.48	55	Y	1	Y	1	5.1	6.16	4.49	1.27	0.48	7.6	N	2	Y	1	0.2	62.26
糖网	2		F	2	24.86	60	N	2	Y	1	8.5	15.7	2.66	1.05	0.7	2.33	N	2	Y	1	0.05	63.19
糖网	2		F	2	20.17	59	Y	1	Y	1	6.3	8.21	4.59	2.76	1.52	1.21	N	2	Y	1	0.1	79.16
糖网	2		M	1	26.25	35	N	2	Y	1	7.6	13.46	5.39	3.68	0.8	2.65	N	2	Y	1	FC/20CM	66.23
糖网	2		M	1	29.41	45	Y	1	Y	1	5.2	6.21	4.62	2.68	1.73	0.92	N	2	Y	1	0.1	78.41
糖网	2		M	1	32.06	61	Y	1	Y	1	7.9	13.35	4.61	2.98	1.47	1.09	N	2	Y	1	0.2	85.5
糖网	2		M	1	22.45	43	N	2	Y	1	7.3	14.17	3.71	2.06	0.64	3.32	N	2	Y	1	0.1	61.1
糖网	2		M	1	24.36	79	Y	1	Y	1	9.4	29.04	7.9	1.05	1.01	0.97	N	2	Y	1	FC/30CM	98.18
糖网	2		M	1	22.63	43	N	2	Y	1	9.1	19.7	6.01	3.01	1.54	0.76	N	2	Y	1	HM/20CM	73.13
糖网	2		F	2	21.42	58	Y	1	Y	1	9.6	10.36	3.61	1.74	1.66	1.37	N	2	Y	1	FC/30CM	69.1
糖网	2		M	1	26.75	56	Y	1	Y	1	8.5	12.04	2.69	1.33	0.9	2.01	N	2	Y	1	0.01	86.21
糖网	2		F	2	23.17	52	N	2	Y	1	6.4	7.37	5.5	3.21	0.45	1.66	N	2	Y	1	HM/28CM	71.4
糖网	2		F	2	20.86	46	Y	1	Y	1	6.1	7.49	2.15	0.94	1.67	0.45	N	2	Y	1	HM/10CM	83.51
糖网	2		F	2	29.47	40	Y	1	Y	1	5	5.46	4.13	2.5	1.12	1	N	2	Y	1	FC/10CM	73.6
糖网	2		F	2	23.65	70	N	2	Y	1	7.1	10.1	5.12	1.76	1.67	1.14	N	2	Y	1	0.3	80.15

## Sheet: 非靶向玻璃体（整理）
disease	对应编号	SampleID	gender	Gender	BMI (kg/m2)	AGE	HYPERTENSION	HYPERTENSION	diabetes	diabetes	Hab % 4.4-6.0	Blood Glucose mmol/L 3.9-6.1	Total cholesterol (mmol/L) <5.2	LDL cholesterol (mmol/L)1.3-4.14	HDL cholesterol (mmol/L) 0.95-1.85	甘油三酯<1.7mmol/l	Chronic kidney disease	Chronic kidney disease	On diabetes medication	On diabetes medication	SCr
RD	1	VC1	f	2	23.15	42	y	1	n	2	5.1	6.39	3.7	4.23	1.27	1.21	n	2	n	2	66.12
RD	1	VC2	F	2	23.23	60	Y	1	N	2	5.2	5.56	4.72	2.76	1.8	2.11	N	2	N	2	70.2
RD	1	VC5	f	2	21.47	58	Y	1	n	2	6.4	8.42	4.23	2.66	1.21	1.01	N	2	N	2	67.14
RD	1	VC6	f	2	22.18	62	y	1	N	2	5.1	5.37	3.9	1.89	1.05	0.93	N	2	N	2	89.51
RD	1	VC8	f	2	25.46	60	n	2	N	2	4.8	6.6	4.02	3.47	0.97	1.21	N	2	N	2	65.3
RD	1	VC10	M	1	27.78	38	N	2	N	2	5.1	7.9	4.25	2.6	1.5	2.84	N	2	N	2	72.4
RD	1	VC11	M	1	17.3	54	N	2	n	2	4.8	5.2	4.78	3.35	1.1	1.09	N	2	N	2	81.17
RD	1	VC12	f	2	22.17	50	y	1	N	2	4.6	6.3	5.12	2.85	0.86	1.45	N	2	N	2	73.25
RD	1	VC13	f	2	26.16	44	y	1	n	2	5.2	7.2	4.85	2.51	0.71	2.75	N	2	N	2	72.73
RD	1	VC14	F	2	24.18	41	n	2	N	2	5.1	6.8	4.04	1.23	1.21	1.89	N	2	N	2	82.56
RD	1	VC15	F	2	24.27	48	n	2	n	2	5.4	6.2	3.86	1.45	1.35	3.12	N	2	N	2	91.72
RD	1	VC16	M	1	24.23	32	y	1	N	2	5	5.33	2.4	1.87	0.65	2.85	N	2	N	2	65.81
RD	1	VC17	M	1	25.17	34	n	2	n	2	5.1	6.55	3.2	2.03	0.98	0.89	N	2	N	2	64.19
RD	1	VC19	F	2	22.71	68	Y	1	n	2	4.7	5.5	4.85	2.97	1.27	2.54	N	2	N	2	73.3
RD	1	VC20	F	2	25.19	65	N	2	N	2	4.9	5.5	5.26	2.74	1.35	2.14	N	2	N	2	80.24
RD	1	VC21	M	1	22.23	65	N	2	N	2	4.7	5.84	4.13	2.29	1.78	1.35	N	2	N	2	81.27
RD	1	VC22	M	1	23.17	67	N	2	N	2	4.5	4.8	4.03	2.7	0.93	1.68	N	2	N	2	75.15
RD	1	VC23	F	2	26.85	58	N	2	N	2	5.2	5.45	4.57	3.47	1.11	3.06	N	2	N	2	59.83
RD	1	VC24	F	2	23.04	62	N	2	N	2	4.5	4.25	6.53	4.76	1.76	1.02	N	2	N	2	65.16
RD	1	VC25	F	2	21.08	71	N	2	N	2	6	7.1	3.1	2.87	0.84	1.17	N	2	N	2	86.93
MH	1	VC26	M	1	24.19	67	N	2	N	2	5.9	6.23	4.55	2.82	1.72	0.88	N	2	N	2	74.82
RD	1	VC27	M	1	26.23	41	N	2	n	2	5.9	6.07	3.62	2.27	0.75	1.61	N	2	N	2	87.25
糖网	2		F	2	23.45	27	Y	1	Y	1	4.9	4.92	4.27	2.34	0.77	4.79	N	2	Y	1	58.06
糖网	2		F	2	22.58	50	N	2	Y	1	5	5.38	5.43	3.88	1.19	1.53	N	2	Y	1	79.24
糖网	2		f	2	26.07	56	y	1	y	1	7.7	11.95	4.97	3.14	1.79	0.96	n	2	y	1	84.5
糖网	2		F	2	20.18	31	N	2	Y	1	5.6	5.8	3.99	2.52	0.98	0.75	N	2	y	1	60.46
糖网	2		m	1	22.18	58	y	1	y	1	6.6	7	2.9	3.22	1.43	0.4	n	2	y	1	83.3
糖网	2		m	1	23.54	53	n	2	y	1	7.4	9.64	4.9	4.12	1.21	1.09	n	2	y	1	71.09
糖网取油	2		F	2	20.17	57	y	1	y	1	5.6	5.25	4.25	1.41	1.05	8.49	y	1	y	1	62.01
糖网	2		f	2	19.27	63	y	1	y	1	6.5	8.08	3.12	1.71	1.05	1.02	n	2	y	1	81.25
糖网	2		f	2	22.03	65	n	2	y	1	7.8	14.3	4.43	2.59	1.26	0.98	n	2	y	1	73.05
糖网	2		f	2	25.18	56	y	1	y	1	7.7	11.95	4.97	3.14	1.79	0.96	n	2	y	1	62.16
糖网	2		m	1	28.06	56	y	1	y	1	6.7	7.39	4.83	3.1	1.71	1.7	n	2	y	1	89.28
糖网	2		M	1	20.29	54	y	1	y	1	5.1	5	4.12	3.12	0.94	2.16	n	2	y	1	101.85
糖网	2		m	1	23.18	42	n	2	y	1	6.5	9	3.48	1.87	0.89	2.02	n	2	y	1	72.64
糖网	2		m	1	22.17	41	y	1	y	1	5.3	4.53	3.71	2.71	0.77	1.29	n	2	y	1	87.76
糖网	2		F	2	28.25	52	Y	1	Y	1	5.5	6.34	6.29	4.3	1.84	1.58	N	2	y	1	64.6
糖网	2		M	1	33.05	26	N	2	y	1	5.2	5.9	6.98	3.44	1.02	7.91	N	2	y	1	88.7
糖网	2		F	2	26.17	50	Y	1	Y	1	6.4	7.86	3.62	1.78	1.07	2.34	N	2	y	1	82.03
糖网	2		M	1	20.25	29	N	2	Y	1	5.3	6.08	3.29	1.87	1.31	0.55	N	2	y	1	75.17
糖网	2		M	1	21.26	56	N	2	y	1	6.4	7.32	3.39	1.72	1.5	1.17	N	2	y	1	58.15
糖网	2		F	2	22.23	43	N	2	Y	1	7.1	8.99	3.98	2.84	0.96	0.91	N	2	y	1	67.38
糖网	2		F	2	23.67	54	N	2	y	1	7.6	10.32	5.68	4.07	1.07	2.78	N	2	y	1	84.03
糖网	2		F	2	20.68	41	Y	1	Y	1	5	4.96	4.88	2.63	1.33	4.7	N	2	y	1	72.83
糖网	2		F	2	22.19	61	Y	1	Y	1	6.4	9.09	6.68	5.06	1.56	1.89	N	2	y	1	80.69
糖网	2		M	1	23.05	48	n	2	Y	1	6.1	7.35	4.85	2.45	0.85	0.77	N	2	y	1	68.43
糖网	2		M	1	20.87	55	Y	1	Y	1	5	5.8	3.9	1.53	1.06	2	N	2	y	1	54.79
糖网	2		F	2	21.27	57	N	2	Y	1	6.1	8.23	6.19	4.45	0.77	2.21	N	2	y	1	69.73
糖网	2		M	1	28.45	43	N	2	Y	1	6.6	6.63	3.67	2.76	0.55	2.04	N	2	y	1	58.05
糖网	2		F	2	26.15	65	N	2	Y	1	5.3	5.47	5.44	3.27	1.08	2	N	2	y	1	60.59

## Sheet: 整理
Group 玻璃体	Gender (M/F)	Age	BMI(kg/m2)	Hypertension (y/n)	Diabetes (y/n)	Hab	Glucose (mmol/L)	Total cholesterol (mmol/L)	LDL cholesterol (mmol/L)	HDL cholesterol (mmol/L)	甘油三酯 (mmol/l)	Chronic kidney disease (y/n)	On diabetes medication (y/n)	Scr
Control	8/14	53.95 (32-71)	23.70(17.3-27.78)	8/14	0/22	5.145 (4.5-6.4)	6.12 (4.25-8.42)	4.26 (2.4-6.53)	2.72 (1.23-4.76)	1.19 (0.65-1.8)	1.76 (0.88-3.12)	0/22	0/22	74.82 (59.83-91.72)
DR	12/16	49.61 (26-65)	23.42 (19.27-33.05)	13/14	28/0	6.157 (4.9-7.8)	7.52 (4.53-14.3)	4.58 (2.9-6.89)	2.89 (1.41-5.06)	1.17 (0.55-1.84)	2.18 (0.4-8.49)	1/27	28/0	73.28 (54.79-101.85)
P	0.650	0.193	0.734	0.345	<0.001	<0.001	0.015	0.266	0.495	0.856	0.363	0.381	<0.001	0.619
Group 房水	Gender (M/F)	Age	BMI(kg/m2)	Hypertension (y/n)	Diabetes (y/n)	Hab	Glucose (mmol/L)	Total cholesterol (mmol/L)	LDL cholesterol (mmol/L)	HDL cholesterol (mmol/L)	甘油三酯 (mmol/l)	Chronic kidney disease (y/n)	On diabetes medication (y/n)	Scr
Control	13/12	58.39 (48-79)	23.41 (18.6-27.18)	9/16	0/25	5.112 (4.4-6)	5.28 (3.89-7.02)	4.18 (1.47-7.21)	2.69 (1.2-4.35)	1.07 (0.23-2.09)	1.18 (0.45-2.09)	0/25	0/25	76.06(60.7-94.13)
DR	12/11	54.39 (35-79)	24.30 (17.96-32.06)	12/11	23/0	7.143 (5-9.6)	10.75 (5.46-29.04)	4.58 (2.15-7.9)	2.26 (0.94-4.45)	1.15 (0.45-1.73)	1.62 (0.34-7.6)	0/23	23/0	72.81(57.11-98.18)
P	0.991	0.114	0.288	0.269	<0.001	<0.001	<0.001	0.385	0.131	0.494	0.170	1	<0.001	0.290
Table 1—Clinical characteristics of vitreous samples selected for discovery metabolomic profiling					Table 2—Clinical characteristics of aqueous humor samples selected for discovery metabolomic profiling
Clinical characteristics	DR cases	Control subjects	P value		Clinical characteristics	DR cases	Control subjects	P value
N	28	22	-		N	23	25	-
Gender (M/F)	12/16	8/14	0.650		Gender (M/F)	12/11	13/12	0.991
Age (years)	49.61 (26-65)	53.95 (32-71)	0.193		Age (years)	54.39 (35-79)	58.39 (48-79)	0.114
Hypertension (y/n)	13/14	8/14	0.345		Hypertension (y/n)	12/11	9/16	0.269
Diabetes (y/n)	28/0	0/22	<0.001		Diabetes (y/n)	23/0	0/25	<0.001
On diabetes medication (y/n)	28/0	0/22	<0.001		On diabetes medication (y/n)	23/0	0/25	<0.001
Chronic kidney disease (y/n)	1/27	0/22	0.381		Chronic kidney disease (y/n)	0/23	0/25	1
BMI (kg/m2)	23.42 (19.27-33.05)	23.70(17.3-27.78)	0.734		BMI (kg/m2)	24.30 (17.96-32.06)	23.41 (18.6-27.18)	0.288
HbA1c (%)	6.157 (4.9-7.8)	5.145 (4.5-6.4)	<0.001		HbA1c (%)	7.143 (5-9.6)	5.112 (4.4-6)	<0.001
FBG (mmol/L)	7.52 (4.53-14.3)	6.12 (4.25-8.42)	0.015		FBG (mmol/L)	10.75 (5.46-29.04)	5.28 (3.89-7.02)	<0.001
TC (mmol/L)	4.58 (2.9-6.89)	4.26 (2.4-6.53)	0.266		TC (mmol/L)	4.58 (2.15-7.9)	4.18 (1.47-7.21)	0.385
LDL-C (mmol/L)	2.89 (1.41-5.06)	2.72 (1.23-4.76)	0.495		LDL-C (mmol/L)	2.26 (0.94-4.45)	2.69 (1.2-4.35)	0.131
HDL-C (mmol/L)	1.17 (0.55-1.84)	1.19 (0.65-1.8)	0.856		HDL-C (mmol/L)	1.15 (0.45-1.73)	1.07 (0.23-2.09)	0.494
TAG (mmol/L)	2.18 (0.4-8.49)	1.76 (0.88-3.12)	0.363		TAG (mmol/L)	1.62 (0.34-7.6)	1.18 (0.45-2.09)	0.170
SCr (µmol/L)	73.28 (54.79-101.85)	74.82 (59.83-91.72)	0.619		SCr (µmol/L)	72.81(57.11-98.18)	76.06(60.7-94.13)	0.290
Data are mean (Range), unless stated otherwise. Independent-samples T test.					Data are mean (Range), unless stated otherwise. Independent-samples T test.
BMI body mass index, HbA1c% glycated haemoglobin, FBG fasting blood-glucose, TC total cholesterol, LDL-C low-density lipoprotein cholesterol, HDL-C high-density lipoprotein cholesterol, TAG triacylglycerol, SCr Serum Creatinine					BMI body mass index, HbA1c% glycated haemoglobin, FBG fasting blood-glucose, TC total cholesterol, LDL-C low-density lipoprotein cholesterol, HDL-C high-density lipoprotein cholesterol, TAG triacylglycerol, SCr Serum Creatinine
Table 1—Clinical characteristics of samples selected for discovery metabonomic profiling
Clinical characteristics DR cases Control subjects with diabetes P value
N 40 40 —
Sex (male) 20 23 0.501†
Age (years) 59 (53–66) 62 (52–69) 0.846‡
Diastolic BP (mmHg) 74 (68–81) 77 (68–83) 0.516‡
Systolic BP (mmHg) 146 (132–155) 133 (122–146) 0.086‡
BMI (kg/m2) 24.5 (23.0–28.1) 28.6 (23.4–30.3) 0.070‡
Serum creatinine (mmol/L) 84 (71–134) 80 (58–117) 0.092‡
Blood glucose, random (mmol/L) 10.4 (6.8–14.6) 8.3 (6.9–11.2) 0.109‡
Total cholesterol (mmol/L) 4.50 (3.99–5.39) 4.38 (3.66– 5.25) 0.320‡
LDL cholesterol (mmol/L) 2.84 (2.17–3.49) 2.59 (2.08–3.27) 0.332‡
HDL cholesterol (mmol/L) 0.98 (0.78–1.23) 1.00 (0.84–1.23) 0.486‡
Triglycerides (mmol/L) 1.79 (1.39–2.59) 1.35 (0.94–2.19) 0.076‡
HbA1c (%) 8.2 (7.4–10.2) 7.4 (6.5–8.0) 0.001‡
Duration of diabetes (years) 12 (7–21) 11 (5–19) 0.374‡
Urine ACR (mg/mg creatinine) 46.0 (16.8–161.6) 25.7 (13.2–56.4) 0.053‡
eGFR (mL/min/1.73 m2) 68.7 (44.6–95.9) 87.5 (50.7–100.9) 0.141‡
Microalbuminuria (n) 21 14 0.115†
Macroalbuminuria (n) 5 2 0.235†
Chronic kidney disease (n)§ 16 11 0.237†
On diabetes medication (n) 34 32 0.556†
Data are median (Range), unless stated otherwise. †Pearson x2 test. ‡Independent-samples T test.§Defined as eGFR below
60 mL/min/1.73 m2.
